# Supplementary material
Source: publisher figshare collection journal article supplement (https://acs.figshare.com/ndownloader/files/22367679)
Supplement: Supplementary file 1 [file 22367679]

## SUPPORTING INFORMATION

### **Determination of ultra-trace level $^{135}\text{Cs}$ and $^{135}\text{Cs}/^{137}\text{Cs}$ ratio in small volume seawater by chemical separation and thermal ionization mass spectrometry**

Liuchao Zhu<sup>1</sup>, Changkun Xu<sup>2</sup>, Xiaolin Hou<sup>1 \*</sup>, Jixin Qiao<sup>1</sup>, Yonggang Zhao<sup>2</sup>, Guorong Liu<sup>2</sup>

<sup>1</sup> Technical University of Denmark, Department of Environmental Engineering, Risø Campus,  
Roskilde DK-4000, Denmark

<sup>2</sup> China Institute of Atomic Energy, Beijing 102413, China

Number of pages in Supporting Information Section : 4, including cover.

Number of Figures in Supporting Information: 4

---

\* Corresponding author: E-mail: [xiho@dtu.dk](mailto:xiho@dtu.dk) (Xiaolin Hou). Fax:45 46775357

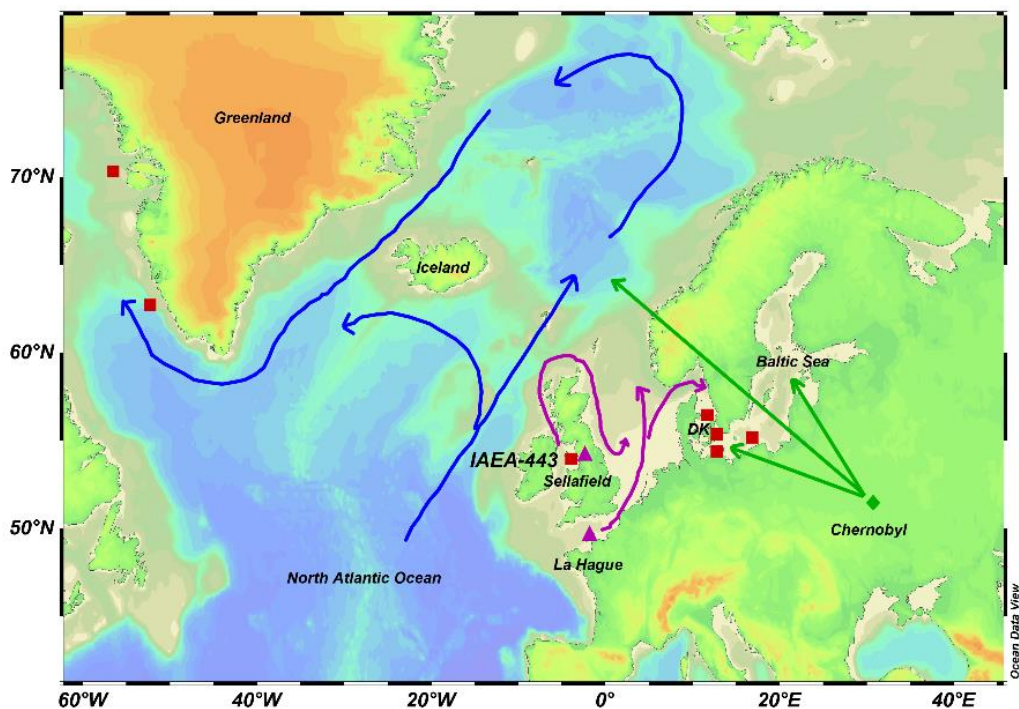

Figure S1. Sampling sites of seawater in Greenland coast, the Baltic Sea and Danish Straits

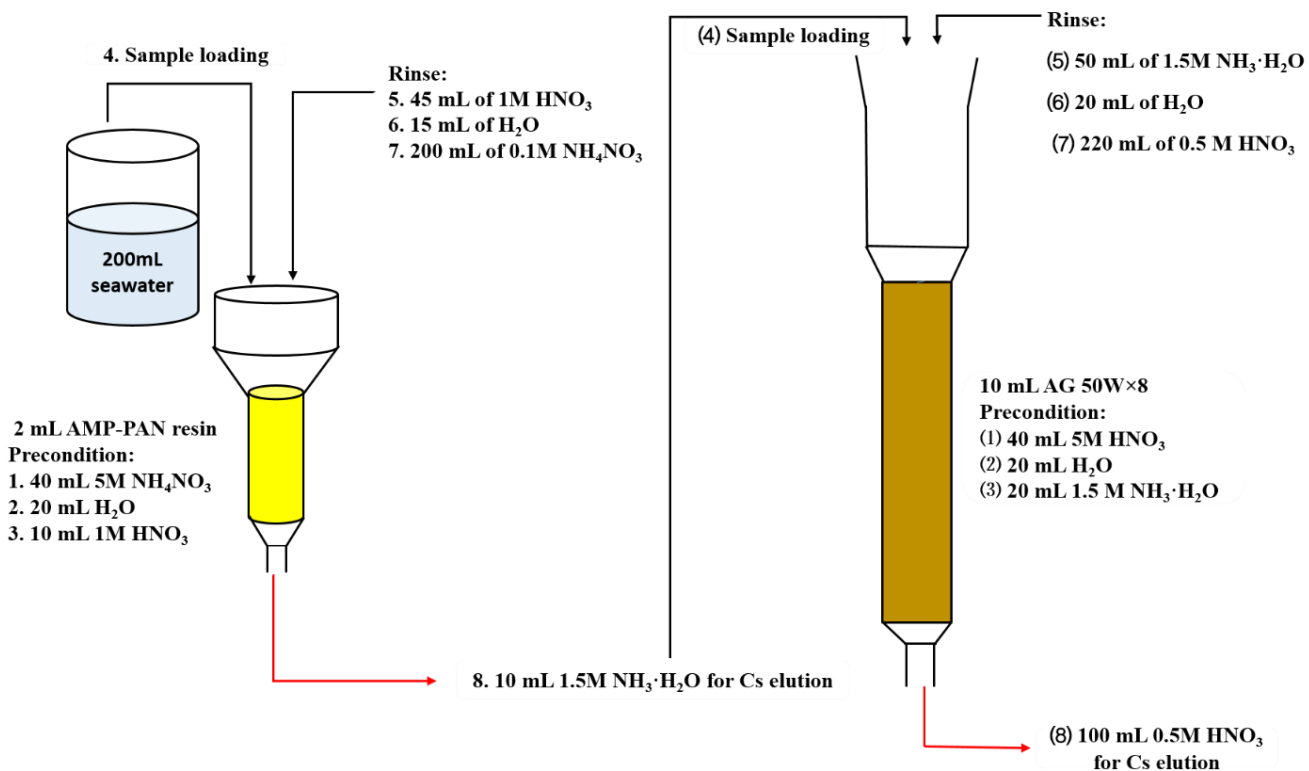

Figure S2. Chemical separation procedure for Cs in low-level seawater samples

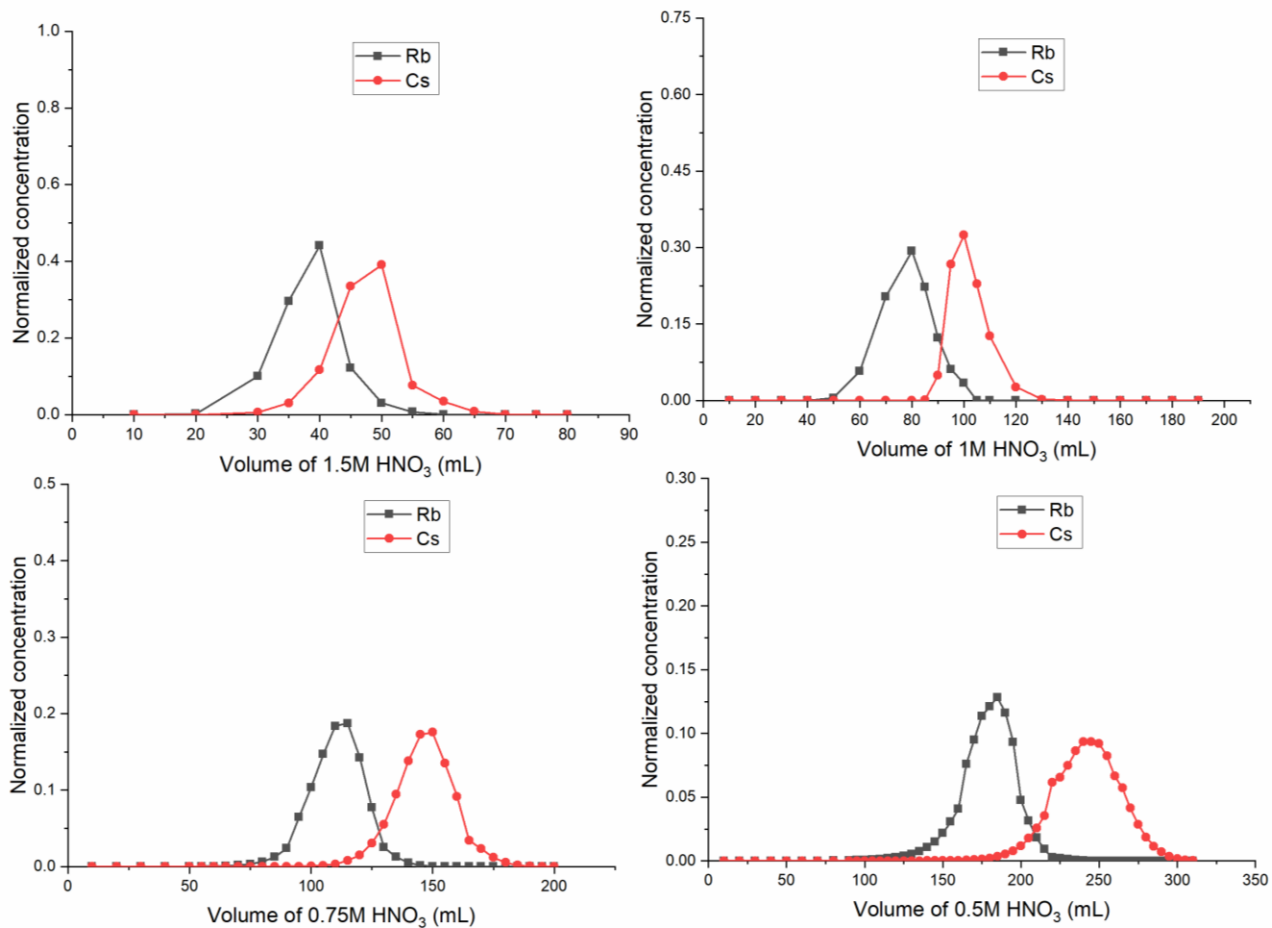

Figure S3. Elution profiles of Cs and Rb from an cation exchange chromatography column (AG 50W- $\times$ 8, H<sup>+</sup> form,  $\phi$ 1.0 cm  $\times$  20 cm ) with different concentration (1.5M, 1M, 0.75M and 0.5M) of HNO<sub>3</sub>

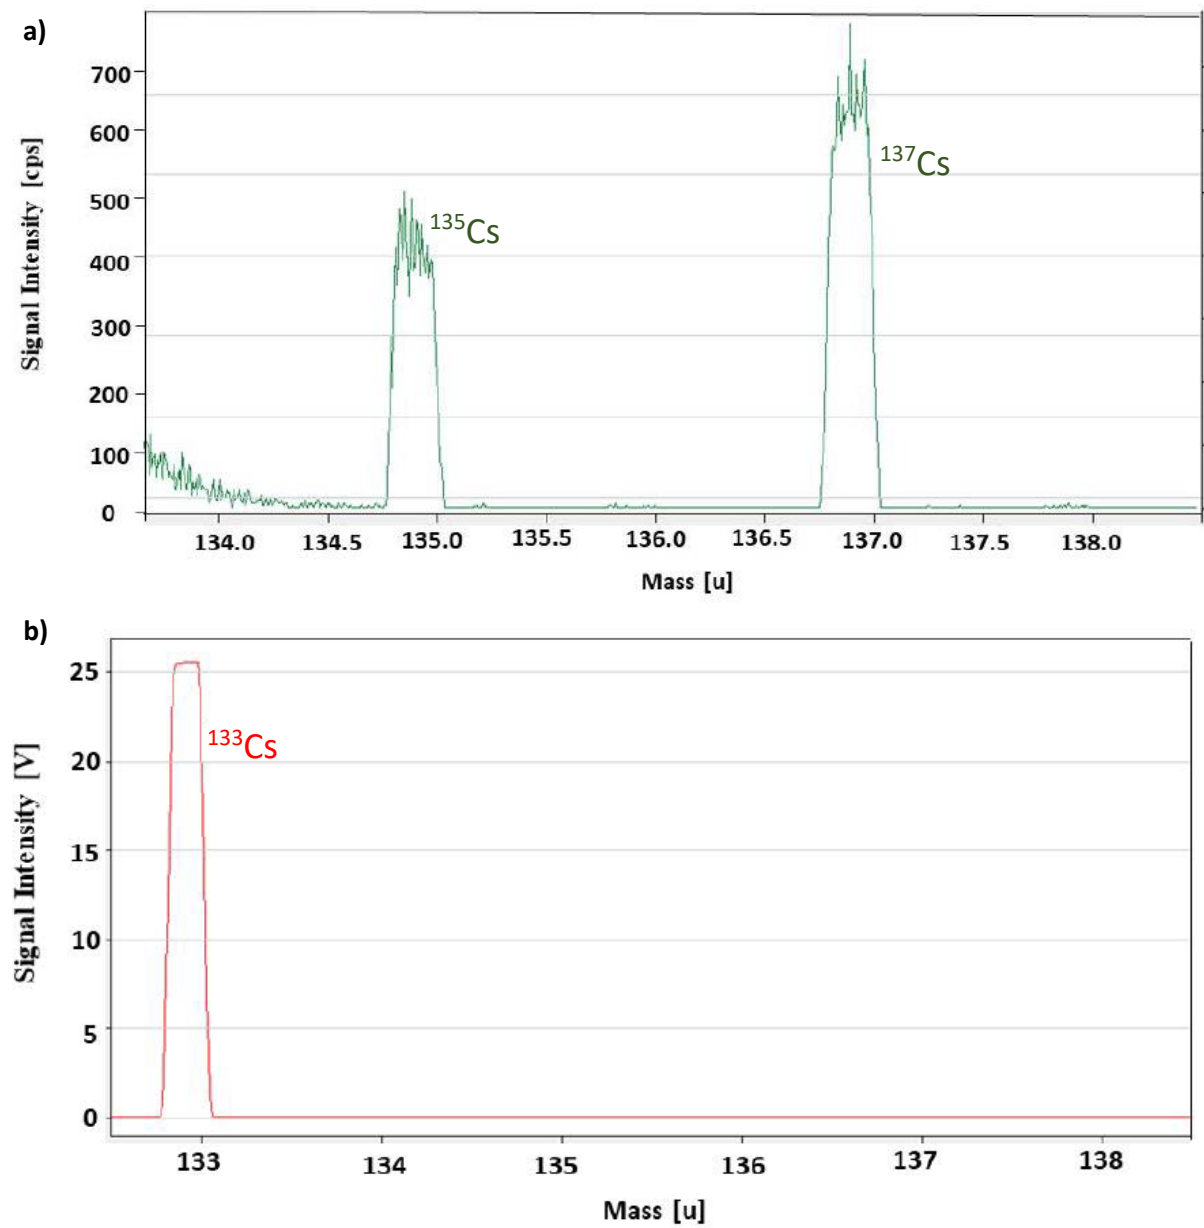

Figure S4. Spectra of mass scan of a real sample (IAEA-375) prepared for TIMS measurement for  $^{135}\text{Cs}$ ,  $^{137}\text{Cs}$  and  $^{138}\text{Ba}$  (a) in green measured by ion counter and  $^{133}\text{Cs}$  (b) in red measured by Faraday cup. The cesium ( $^{133}\text{Cs}$ ) loaded on the filament was estimated to be about 10 ng, which contained 5.6 fg  $^{137}\text{Cs}$  and 2.6 fg  $^{135}\text{Cs}$ .
